# Supplementary material for: Interfacial growth of a metal–organic framework (UiO-66) on functionalized graphene oxide (GO) as a suitable seawater adsorbent for extraction of uranium(vi)
Source: Royal Society of Chemistry journal article supplement (doi:10.1039/c6ta10022h), 2017-01-01
Supplement: c6ta10022h1.pdf [file c6ta10022h1.pdf]

Electronic Supplementary Information for

**Interfacial growth of metal organic framework (UiO-66) on the functionalization of graphene oxide (GO) as a suitable seawater adsorbent for extraction of uranium(VI)**

Peipei Yang,<sup>a</sup> Qi Liu<sup>a\*</sup>, Jingyuan Liu<sup>a</sup>, Hongsen Zhang<sup>a</sup>, Zhanshuang Li<sup>a</sup>, Rumin Li<sup>a</sup>, Lianhe Liu<sup>a</sup> and Jun Wang<sup>a\*</sup>

<sup>a</sup> Key Laboratory of Superlight Material and Surface Technology, Ministry of Education, Harbin 150001, People's Republic of China

Email: zhqw1888@sohu.com, qiliu@hrbeu.edu.cn

**SI.1 Characterization of GO, GO-COOH, UiO-66 and GO-COOH/UiO-66 composites**

**Table S1.** The table compares the atomic percentage of the element consisting in GO, GO-COOH, UiO-66 and

GO-COOH/UiO-66

| Element | GO     | GO-COOH | UiO-66 | GO-COOH/UiO-66 |
|---------|--------|---------|--------|----------------|
|         | Atom % | Atom %  | Atom % | Atom %         |
| C       | 62.7   | 60.2    | 47.8   | 49.1           |
| O       | 37.3   | 39.8    | 38.7   | 39.1           |
| Zr      |        |         | 13.5   | 11.8           |
| Total   | 100    | 100     | 100    | 100            |

**SI.2 Effect of contact time and kinetics study on the adsorption of U(VI) on UiO-66 and GO-COOH/UiO-66 composites**

As the sorption kinetics govern the residence time of the sorption reaction and determine the solute uptake rate or the efficiency of the reaction, the following pseudo-first-order, pseudo-second-order and Weber-Morris (W-M) models are employed to interpret the mechanism controlling the sorption process. The linear form of the two models can be expressed by the following Eqs. S1-S3:

$$\ln(q_e - q_t) = \ln q_e - k_1 t \quad (\text{S1})$$

$$\frac{t}{q_t} = \frac{1}{q_e^2 k_2} + \frac{t}{q_e} \quad (\text{S2})$$

$$q_e = K_{ip} \sqrt{t} + C \quad (\text{S3})$$

Where  $q_t$  and  $q_e$  ( $\text{mg g}^{-1}$ ) are the capacity of U(VI) at time  $t$  (min) and at equilibrium,  $K_{ip}$  is Internal diffusion constant, respectively, and  $k_1$  ( $\text{min}^{-1}$ ) and  $k_2$  ( $\text{g mg}^{-1} \text{min}^{-1}$ ) are the respective rate constants.

**Table S2** Kinetic parameter for adsorption of U(VI)

| Kinetics model      | T/ K | Materials      | K                    | $q_e^{\text{exp}}$ | $q_e^{\text{cal}}$ | $R^2$   |
|---------------------|------|----------------|----------------------|--------------------|--------------------|---------|
| Pseudo-first order  | 298  | UiO-66         | 0.01675              | 839                | 581                | 0.89156 |
|                     |      | GO-COOH/UiO-66 | $3.3 \times 10^{-5}$ | 1002               | 910                | 0.98565 |
| Pseudo-second order | 298  | UiO-66         | 0.01193              | 839                | 900                | 0.99357 |

In order to probe the maximum adsorption capacity and the progress of adsorption, the adsorption isotherms were studied. The adsorption of U(VI) on the UiO-66 and GO-COOH/UiO-66 composites increased with increasing temperature and the Langmuir and Freundlich models were applied to simulate experimental data.

$$C_e/q_e = 1/b \cdot q_m + C_e/q_m \quad (S4)$$

$$\ln q_e = \ln k + 1/n \ln C_e \quad (S5)$$

Where  $C_e$  (mg L<sup>-1</sup>) is the equilibrated U(VI) concentration,  $q_e$  (mg g<sup>-1</sup>) is the amount of U(VI) adsorbed on the adsorbents capacity at equilibrium.  $K$  (L mg<sup>-1</sup>) is a Langmuir constant related to the energy of the adsorbent and  $q_m$  (mg g<sup>-1</sup>) is the saturation capacity at complete monolayer coverage.

**Table S3** Isotherm parameter for adsorption of U(VI)

| Materials      | T (K) | Langmuir isotherm           |                           |         | Freundlich isotherm       |        |         |
|----------------|-------|-----------------------------|---------------------------|---------|---------------------------|--------|---------|
|                |       | $q_0$ (mg g <sup>-1</sup> ) | $b$ (L mg <sup>-1</sup> ) | $R^2$   | $K$ (L mg <sup>-1</sup> ) | $n$    | $R^2$   |
| UiO-66         | 298   | 1012                        | 0.1823                    | 0.99214 | 303.481                   | 2.89   | 0.81628 |
|                | 308   | 1096                        | 0.2769                    | 0.99919 | 373.310                   | 3.29   | 0.87707 |
|                | 318   | 1213                        | 0.3635                    | 0.99481 | 400.234                   | 3.903  | 0.90166 |
| GO-COOH/UiO-66 | 298   | 1097                        | 0.2489                    | 0.99932 | 269.04                    | 2.9986 | 0.83439 |
|                | 308   | 1290                        | 0.3664                    | 0.99972 | 288.885                   | 3.05   | 0.87132 |
|                | 318   | 1336                        | 0.3678                    | 0.99822 | 344.261                   | 3.659  | 0.88349 |

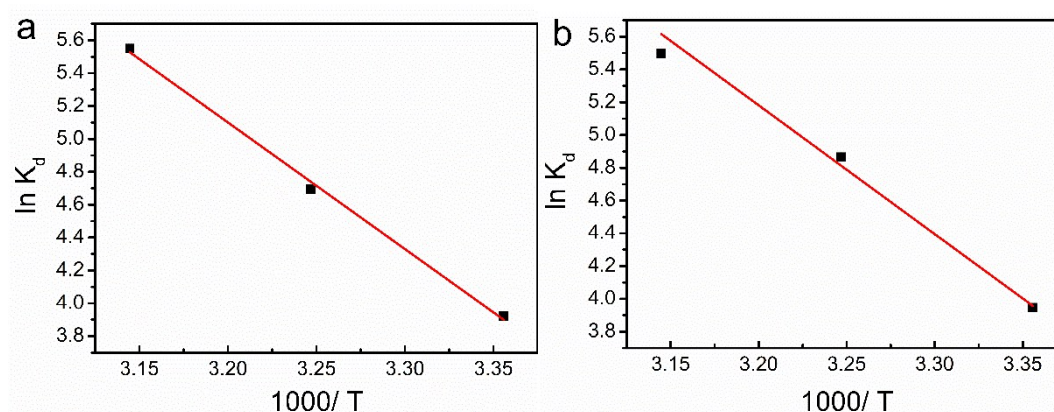

**Fig. S1.** The influence of temperature on the U(VI) sorption on the UiO-66 (a) and GO-COOH/UiO-66 (b) relationship curve between  $\ln K_d$  and  $1000/T$  (1000/K). pH= 8.0; T= 25 °C; amount of adsorbent 0.01 g;  $C_0$ = 512.29 mg L<sup>-1</sup> and  $t$ = 230 min.

**Table S4** The thermodynamic parameters of UiO-66 and GO-COOH/ UiO-66 for U(VI) adsorption

| material       | $\Delta H^\circ$<br>(kJ mol <sup>-1</sup> ) | $\Delta S^\circ$<br>(J mol <sup>-1</sup> K <sup>-1</sup> ) | $\Delta G^\circ$<br>(kJ mol <sup>-1</sup> ) |         |         |
|----------------|---------------------------------------------|------------------------------------------------------------|---------------------------------------------|---------|---------|
| UiO-66         | 65.33                                       | 252.15                                                     | 298.15K                                     | 308.15K | 318.15K |
|                |                                             |                                                            | -75.11                                      | -77.63  | -80.16  |
| GO-COOH/UiO-66 | 64.07                                       | 247.43                                                     | -73.7                                       | -76.12  | -78.66  |

### SI.3 Effect of co-existing ions on UiO-66 and GO-COOH/UiO-66 adsorbents

The selectivity coefficient ( $S_U$ ) for U(VI), is defined as a specific term to describe the potency and degree of selectivity of the adsorbents as follows:

$$S_U = \frac{K_d^U}{K_d^M} \quad (S6)$$

Where  $K_d^U$  and  $K_d^M$  are the distribution ratio of the U(VI) ion and other competing ions in sorbent and solution, respectively

**Table S5** The selectivity coefficients ( $S_{U/M}$ ) of U(VI) for different metal ions in water.

|                          | Ca   | Al   | Ba   | Na   | Mg   | Mn    |
|--------------------------|------|------|------|------|------|-------|
| UiO-66 $S_{U/M}$         | 1477 | 347  | 904  | 354  | 762  | 800   |
| GO-COOH/UiO-66 $S_{U/M}$ | 2072 | 5378 | 1442 | 1366 | 1522 | 15843 |

  

|                          | Sr   | Ni   | Pb  | Zn   | K   | Cu  | Fe  |
|--------------------------|------|------|-----|------|-----|-----|-----|
| UiO-66 $S_{U/M}$         | 1127 | 1179 | 624 | 638  | 446 | 336 | 96  |
| GO-COOH/UiO-66 $S_{U/M}$ | 2835 | 4276 | 734 | 1422 | 501 | 534 | 113 |

### SI.4 adsorption-desorption experiments of GO-COOH/UiO-66 adsorbents

#### SI.4.1 U(VI) desorption experiments

In a typical experiment, 20 mg of sorbent with U(VI) ions was added into 50 mL eluent solution, which included in 0.1 M HCl, 0.1 M NaHCO<sub>3</sub>, 0.1 M NaOH and H<sub>2</sub>O, respectively. The flasks were stirred for specified time (t, min) at room temperature, and then the solid phase was separated from the solution by centrifuge. The results were analysed with WGJ-III Trace Uranium Analyser to obtain the concentrations of U(VI) ions. The elution rate of U(VI) ions was calculated.

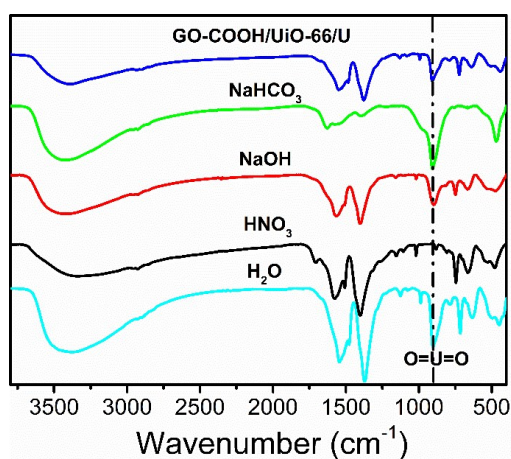

**Fig. S2** FTIR spectroscopy of different eluent agent for GO-COOH/UiO-66 composites.

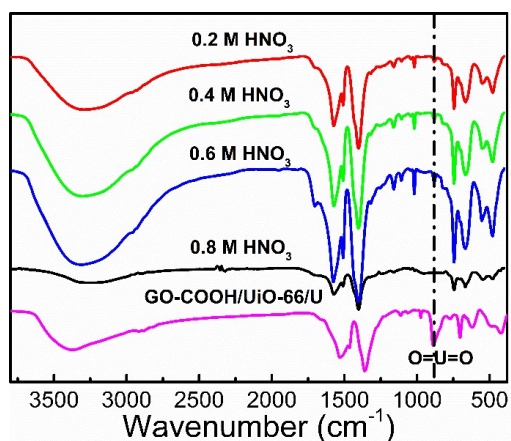

**Fig. S3** FTIR spectroscopy of different concentration of  $\text{HNO}_3$ .

#### SI.4.2 U(VI) absorption-desorption cycle experiments

In a typical experiment, 20 mg of sorbent was added into 50 mL of U(VI) solution and stirred for 6 h at room temperature. The solid phase was separated from the solution by centrifuge. Then, the sorbent in the vacuum drying oven for 24 h. The dried sorbent was placed in the 50 mL eluent solution (0.1 M HCl) for the 6 h. After elution, the GO-COOH/Uio-66 composites was washed with abundant deionized water to remove residual  $\text{H}^+$  and  $\text{UO}_2^{2+}$  until cannot detect  $\text{UO}_2^{2+}$  in the aqueous solutions. The GO-COOH/Uio-66 composites were regenerated by drying at 80 °C for 24 h and then reused. Eventually the elution efficiency of U(VI) ions was calculated. Repeat this experiment operation for five times.

#### SI.5 The mechanism of absorption onto GO-COOH/Uio-66 composites

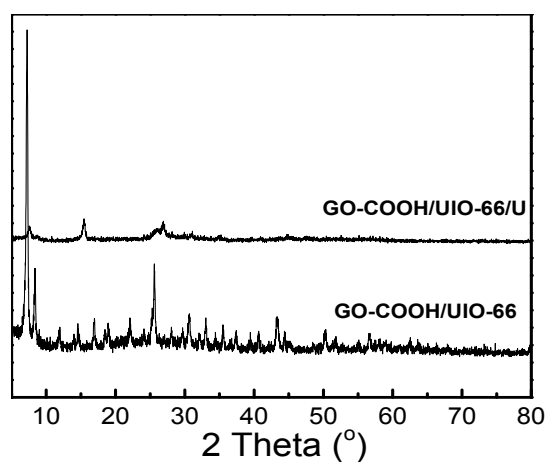

**Fig. S4** XRD of after and before for U(VI) onto the GO-COOH/Uio-66 composites.
